# Supplementary material
Source: MDPI journal article supplement (https://www.mdpi.com/2073-4441/10/4/365)
Supplement: s1 [file s1]

# Supplementary Materials: Effects of Reclaimed Water Irrigation on Microbial Diversity and Composition of Soil with Reducing Nitrogen Fertilization

Wei Guo <sup>1,2</sup>, Xuebin Qi <sup>1,\*</sup>, Yatao Xiao <sup>1,3</sup>, Ping Li <sup>1,2</sup>, Mathias Neumann Andersen <sup>4</sup>, Yan Zhang <sup>1,2</sup> and Zhijuan Zhao <sup>1,2</sup>

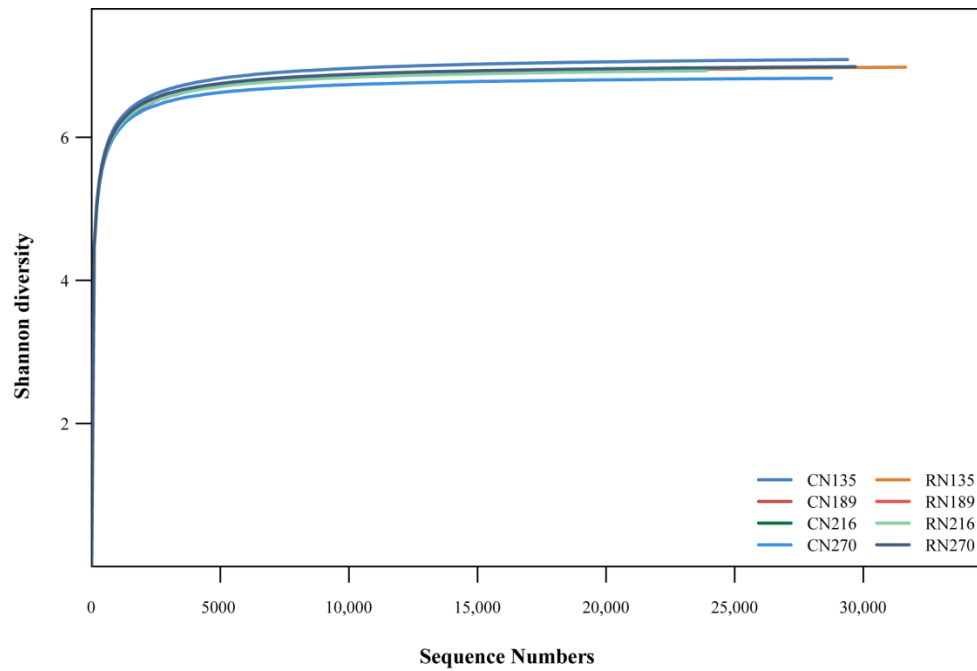

**Figure S1.** Shannon-Wiener curve of soils with different nitrogen levels under reclaimed water irrigation (cutoff = 0.03). The x and y axes show the sequence number of branches randomly selected from samples and the Shannon-Wiener index, respectively, as an estimate of community diversity. Each sample is represented by a different color.
